# Supplementary material for: Leaf carbon and nitrogen stoichiometric variation along environmental gradients
Source: Copernicus journal article supplement (doi:10.5194/bg-20-4511-2023), 2023-11-17
Supplement: Supplementary file 1 [file bg-20-4511-2023-supplement.pdf]

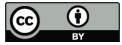

*Supplement of*

## **Leaf carbon and nitrogen stoichiometric variation along environmental gradients**

**Huiying Xu et al.**

*Correspondence to:* Han Wang ([wang\\_han@tsinghua.edu.cn](mailto:wang_han@tsinghua.edu.cn))

The copyright of individual parts of the supplement might differ from the article licence.

**Table S1 Summary of the mixed model relating  $N_{\text{mass}}$  to  $V_{\text{cmax25}}/M_a$ , with LAI as a random effect on both the slope and the intercept.**

|            |     | slope      | intercept  |
|------------|-----|------------|------------|
| LAI effect |     | $p = 0.03$ | $p < 0.01$ |
| LAI group  | 0-1 | 0.34       | 2.04       |
|            | 1-2 | 0.62       | 1.75       |
|            | 2-3 | 0.64       | 1.86       |
|            | 3-4 | 0.66       | 1.79       |
|            | 4-5 | 0.72       | 1.55       |
|            | >5  | 0.76       | 1.44       |

**Table S2 Summary of the multiple regression on distance matrices (MRM) between leaf stoichiometric traits and spatial distance and bioclimatic factors.**

|                           | $C_{\text{mass}}$ | $N_{\text{mass}}$ | C:N ratio |
|---------------------------|-------------------|-------------------|-----------|
| Spatial distance $r^2$    | 0.004             | 0.002             | 0.000     |
| Bioclimatic factors $r^2$ | 0.006             | 0.019             | 0.014     |

**Fig. S1 The locations and biomes of sites in this study.** (a) Each red dot is a site from CPTDv2. (b) Whittaker plot, showing site climates as black dots.

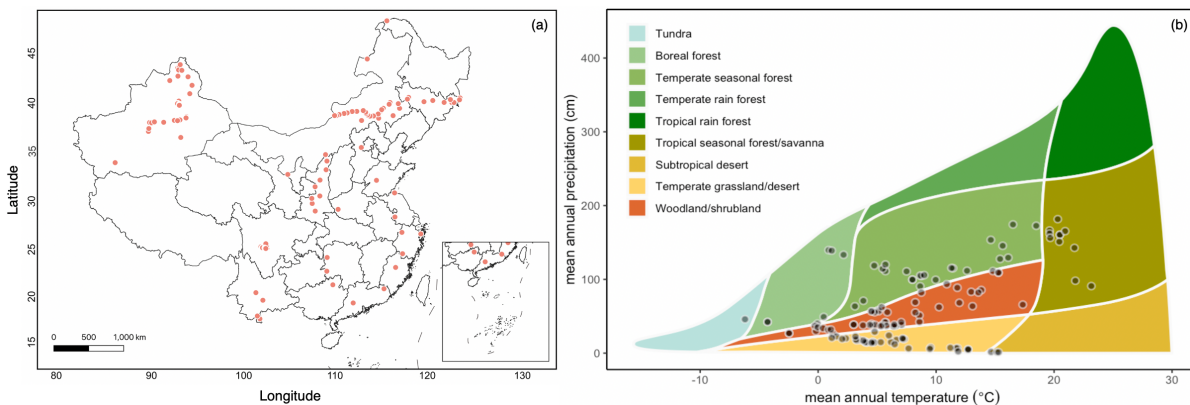

10

**Fig. S2 The relationships between leaf stoichiometric traits and soil C:N ratio.** Yellow and green dots are deciduous and evergreen species, respectively.

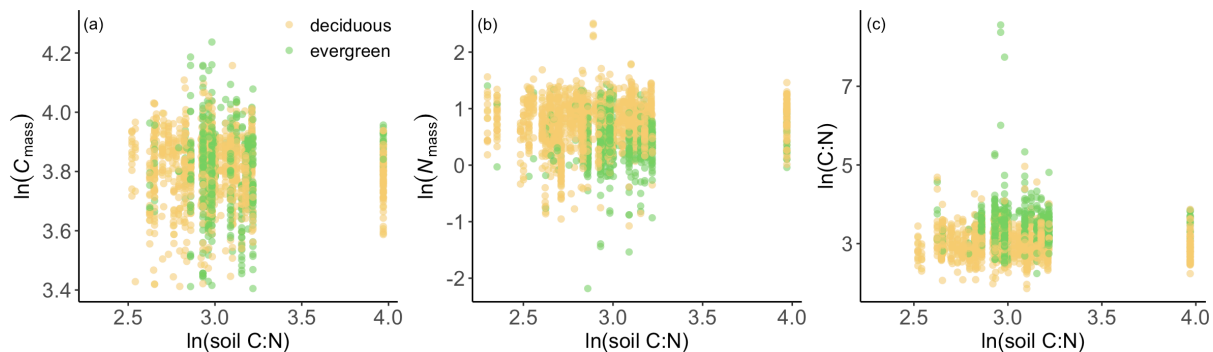

**Fig. S3 The relationship between leaf carbon ( $C_{\text{mass}}$ ), nitrogen concentration ( $N_{\text{mass}}$ ) and C:N ratio.** Grey lines are isolines of constant C:N ratio. The x and y axes are natural-log transformed. Yellow and green dots are deciduous and evergreen species respectively.

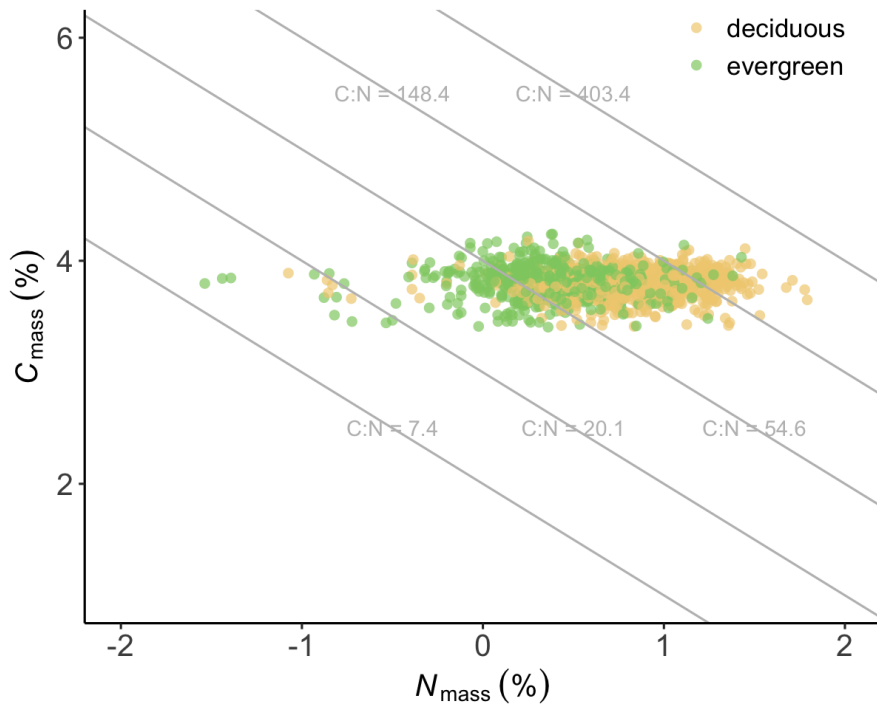

20 **Fig. S4 Histogram of standard deviations (SD) for the within- and between-site variation of each trait.** Dashed and solid lines represent between-site and mean within-site SD, respectively. Yellow and green colours distinguish deciduous and evergreen species.

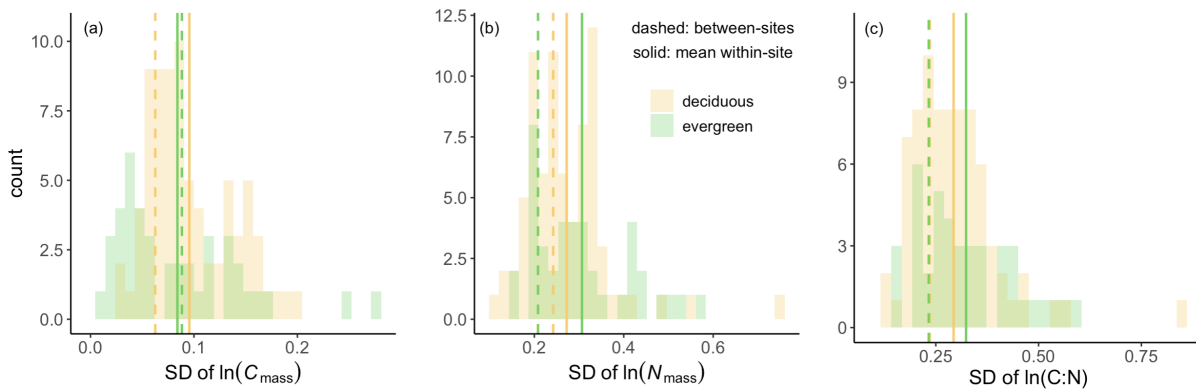

25
